# Supplementary material for: Culture Ordering for Patients with New-onset Fever: A Survey of Pediatric Intensive Care Unit Clinician Practices
Source: PubMed Central journal article supplement (PMC8389917; doi:10.1097/pq9.0000000000000463), 2021-08-26
Supplement: pqs-6-e463-s001.pdf [file pqs-6-e463-s001.pdf]

1 **Culture ordering for patients with new-onset fever: a survey of pediatric intensive care unit**  
2 **clinician practices**

3  
4 **First Author:** Lauren D. Booth, MSN, CRNP\*

5 \*Department of Anesthesiology and Critical Care Medicine, Johns Hopkins Hospital, Baltimore,  
6 MD

7  
8 **Supplement 1**

9 **Scenario 1**

10 You are providing care for a 5-month-old previously healthy female admitted to the  
11 pediatric intensive care unit for respiratory distress. The patient was diagnosed with RSV  
12 bronchiolitis on hospital day 1 and intubated on hospital day 4. It is currently hospital day 6 and  
13 the nurse notifies you that the patient has a new fever to 38.8°C. Her other vital signs are  
14 unremarkable aside from mild tachycardia. The patient continues to have the same quantity of  
15 moderate, thick yellow secretions. The morning chest x-ray demonstrated peri-bronchial cuffing  
16 without focal consolidation.

17 The patient's labs are unremarkable. For access, the patient has a double lumen central  
18 line with no blood return that flushes well and 2 peripheral IVs. The patient is not currently on  
19 antibiotics. No culture specimens have been drawn this admission.

20  
21 Will you obtain the following culture specimens?

22  
23 **Scenario 2**

24 You are still caring for the patient in scenario 1—a 5-month-old previously healthy  
25 female with RSV bronchiolitis intubated on hospital day 4 who developed a new fever on  
26 hospital day 5. It is now hospital day 6. Yesterday, you decided to obtain a peripheral blood  
27 culture and a vascular ultrasound to assess for a thrombus around the double lumen central line  
28 that did not have blood return. The ultrasound revealed an occlusive thrombus. The patient  
29 continues to be intubated with no other changes in her clinical status. Her vital signs remain  
30 unremarkable aside from another fever to 38.5°C. There is no change in her respiratory  
31 secretions or morning chest x-ray findings (peri-bronchial cuffing without focal consolidation).

32 The patient is not on antibiotics. The peripheral blood culture from yesterday is no growth to  
33 date.

34

35 Will you obtain the following culture specimens?

36

### 37 **Scenario 3**

38 You are providing care for a 6-year-old male admitted to the pediatric intensive care unit  
39 after a mandibular distraction with the general surgical team. The patient has an extended past  
40 medical history, including Pierre Robin and tracheostomy dependence with trach collar during  
41 the day and CPAP 5 cm H2O at 21% overnight.

42 It is now post-op day 1 and the bedside nurse notifies you that the patient is febrile to  
43 38.5°C. He remains hemodynamically stable. On your morning assessment, he is on his trach  
44 collar 21% with clear secretions without hypoxia. He is comfortable on his low dose dilaudid and  
45 ketamine infusions. You review the patient's labs, which are unremarkable except for anemia  
46 (Hgb 9) and leukocytosis (WBC 17). For access, the patient has a double lumen internal jugular  
47 central line, 2 peripheral IVs, and a peripheral arterial line. A urinary catheter was removed last  
48 night. The patient is currently receiving peri-op Ancef for 24 hours. There are no culture  
49 specimens on this admission.

50

51 Will you obtain the following culture specimens?

52

### 53 **Scenario 4**

54 You are providing care for a 2-year-old male admitted to the pediatric intensive care unit  
55 for respiratory failure in the setting of status epilepticus. The patient missed several doses of his  
56 anti-epileptic medication at home and then presented to an outside hospital in status epilepticus.  
57 He was intubated given his inability to protect his airway and transferred to your hospital. It is  
58 currently hospital day 4 and the patient remains intubated given the need to escalate his anti-  
59 epileptic agents. The overnight team escalated his PEEP on evening rounds due to persistent  
60 hypoxia.

61 During your morning assessment, the bedside nurse notifies you that the patient is febrile  
62 to 38.8°C with more respiratory secretions in comparison to yesterday. His other vital signs are

63 significant for mild tachycardia. For access, he has a double lumen femoral line, 1 peripheral IV,  
64 a peripheral arterial line, and a urinary catheter to straight drain for urinary retention. You review  
65 the patient's labs, which are significant for anemia (Hgb 10), leukocytosis (WBC 14.2), and  
66 thrombocytosis (432). A chest x-ray demonstrates a new retrocardiac opacification.

67 The patient is not currently on an antibiotic regimen. The blood, urine, and CSF cultures  
68 from admission are no growth to date. The CSF specimen was not concerning for infection. The  
69 respiratory viral panel from admission is negative.

70

71 Will you obtain the following culture specimens?

72

### 73 **Scenario 5**

74 You are providing care for an 18-day-old male with respiratory distress. He was initially  
75 transferred from an outside hospital with mild respiratory distress secondary to rhinovirus. He  
76 required frequent nasopharyngeal suctioning for respiratory secretions and was stable on high-  
77 flow nasal cannula 6L 40% until last night. The overnight medical team increased his respiratory  
78 support given his worsening work of breathing and hypoxia.

79 On your morning assessment, the infant is lethargic, tachypneic with moderate work of  
80 breathing on high-flow nasal cannula 10L, 100% with pulse ox 91%. He is tachycardic (HR 195)  
81 and hypotensive (MAP 33) with a rectal temperature of 38.3°C. The patient has 1 peripheral IV  
82 for access. There are no recent labs on the patient. He is not currently on antibiotics.

83

84 Will you obtain the following culture specimens?

85

### 86 **Scenario 6**

87 You are providing care for a 12-year-old female admitted to the pediatric intensive care  
88 unit for septic shock and a prolonged intubation course on sedating and paralyzing infusions. She  
89 was extubated to BiPAP several days ago and now is on high-flow nasal cannula with good  
90 effect. A peripherally inserted central catheter line was placed 10 days ago for antibiotics  
91 (completed 14-day course of antibiotics) and a prolonged sedation wean. The precedex infusion  
92 was weaned yesterday.

93           During your morning assessment, the bedside nurse notifies you that the patient is febrile  
94 to 38.5°C. The patient appears agitated in the bed with mild tachycardia and hypertension. She  
95 continues on her nasoduodenal feeds with new onset loose stools and retching. The patient's labs  
96 are unremarkable. The patient is not currently on an antibiotic regimen. The most recent blood  
97 and respiratory cultures are negative from hospital day 6. Today is hospital day 16.

98

99 Will you obtain the following culture specimens?

100

101 **Scenario 7**

102           You are providing care for an 11-year-old male with relapsed ALL undergoing induction  
103 therapy. He was transferred to the pediatric intensive care unit several days ago for respiratory  
104 distress in the setting of fever with neutropenia. He has been on stable high-flow nasal settings  
105 since admission.

106           The bedside nurse notifies you that the patient has a new onset fever this morning to  
107 38.5°C. He is tachycardic with HR 150. Of note, the patient has new onset diarrhea. For access,  
108 the patient has a double lumen Hickman central line and 1 peripheral IV. The patient is currently  
109 on cefepime given his history of fever 5 days ago alongside of his neutropenia. He remains  
110 neutropenic. His blood cultures remain no growth to date.

111

112 Will you obtain the following culture specimens?
